# Supplementary material
Source: PubMed Central journal article supplement (PMC7494583)
Supplement: NIHMS1568078-supplement-1.pdf [file NIHMS1568078-supplement-1.pdf]

# Supplemental information: Comparisons of simple and complex methods for quantifying exposure to point source air pollution emissions

*Lucas RF Henneman<sup>1</sup>, Irene C Dedoussi<sup>2,3</sup>, Joan A Casey<sup>4,5</sup>, Christine Choirat<sup>6</sup>, Steven RH Barrett<sup>3</sup>, and Corwin M Zigler<sup>7</sup>*

<sup>1</sup>Department of Biostatistics, Harvard T. H. Chan School of Public Health, Boston, U.S.A.

<sup>2</sup>Faculty of Aerospace Engineering, Delft University of Technology, Delft, The Netherlands

<sup>3</sup>Department of Aeronautics and Astronautics, Massachusetts Institute of Technology, Boston, U.S.A.

<sup>4</sup>School of Public Health, University of California, Berkeley, U.S.A.

<sup>5</sup>Columbia University Mailman School of Public Health, New York, U.S.A.

<sup>6</sup>Swiss Data Science Center, ETH Zürich and EPFL, Lausanne, Switzerland

<sup>7</sup>Department of Statistics and Data Sciences and Department of Women's Health, University of Texas, Austin, U.S.A.

## SI-1 Reduced complexity approaches as PM<sub>2.5</sub>

For HyADS and IDWE exposure fields to all emissions sources ( $exposure_{i,j}^m$ ), we projected raw exposure fields to match the CMAQ-DDM Hybrid grid and trained multiple models over the continental United States. Along with model defined in equation (4) in the main paper, we trained two additional linear models:

$$PM_{2.5}^{CMAQ-DDM} = \beta_0^m + \beta_{exp}^m \sum_{j=1}^J exposure_j^m + \epsilon^m \quad (SI-1)$$

$$PM_{2.5}^{CMAQ-DDM} = \beta_0^m + \beta_{exp}^m \sum_{j=1}^J exposure_j^m + \beta_{\vec{X}}^m \vec{X} + \beta_{exp, \vec{X}}^m * \sum_{j=1}^J exposure_j^m + \beta_s^m s(x, y) + \epsilon^m \quad (SI-2)$$

where  $PM_{2.5}^{CMAQ-DDM}$  is PM<sub>2.5</sub> coal impacts from CMAQ-DDM Hybrid,  $\vec{X}$  is the vector of meteorological variables from the North American Reanalysis<sup>1</sup>, and  $s(x, y)$  is a bivariate spline of latitude and longitude (in meters) with 100 knots.  $\epsilon$  is assumed iid normal with no spatial structure. We employed average temperature, accumulated precipitation, relative humidity, and x and y wind vectors for meteorological inputs.

As a fourth model, we employed a Z-score adjustment of  $exposure^m$  to match that of  $PM_{2.5}^{CMAQ-DDM}$ . For conversions of  $exposure_j^m$  to  $PM_{2.5}^m$ , we employed this equation:

$$PM_{2.5,j}^m = sd(PM_{2.5}^{CMAQ-DDM}) * \left( \frac{exposure_j^m - mean(exposure^m)}{sd(exposure^m)} + mean(PM_{2.5}^{CMAQ-DDM}) \right) \quad (SI-3)$$

where  $sd(\bullet)$  represents the standard deviation and  $mean(\bullet)$  represents the mean.

### SI-1.1 Annual evaluation

We trained the models using total PM<sub>2.5</sub> coal source impacts in 2005 and evaluated them by predicting 2006 total PM<sub>2.5</sub> coal source impacts (Figure SI-1). The linear model formulation in the main document was found to have the best performance and the least complex formulation; therefore, we present results from this model throughout the main results and the remainder of this document.

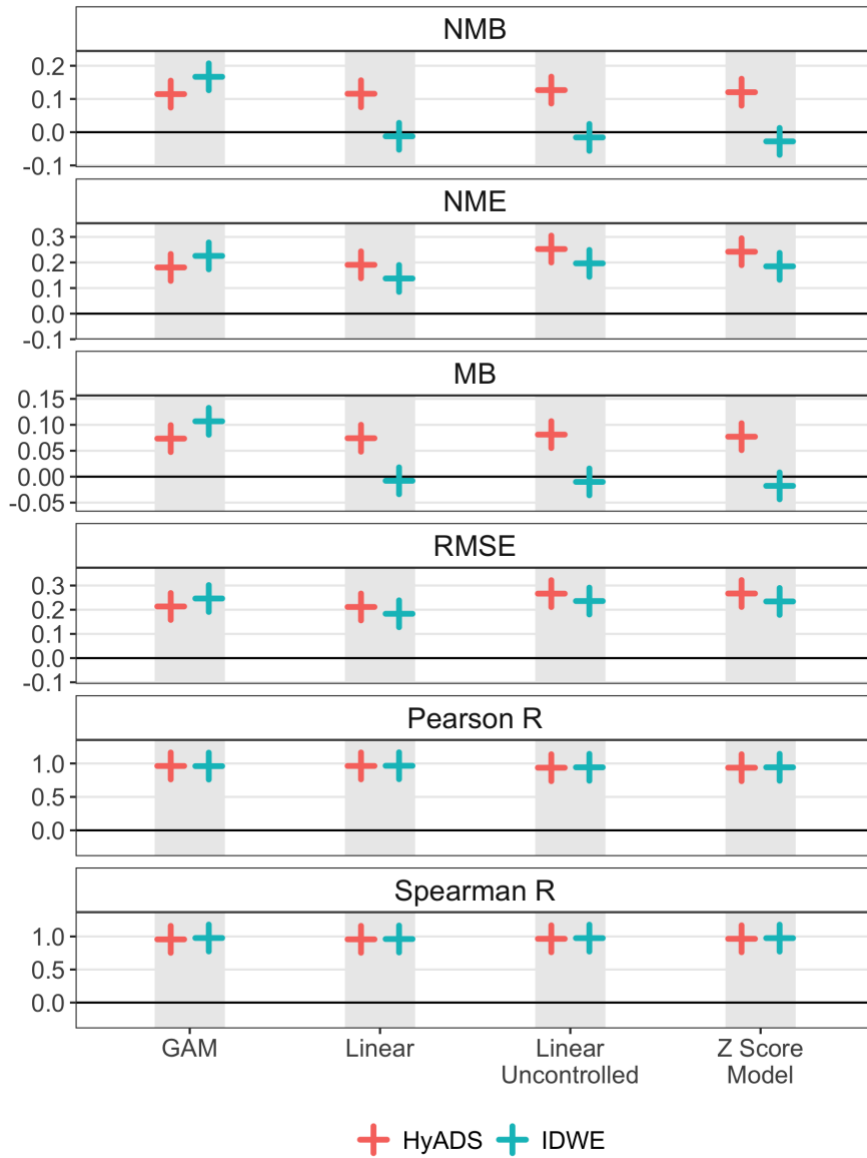

Figure SI-1: Evaluation statistics for total annual coal  $PM_{2.5}$  source impacts  $PM_{2.5}^m$  evaluated against  $PM_{2.5}^{CMAQ-DDM}$ .

## SI-1.2 Monthly evaluation

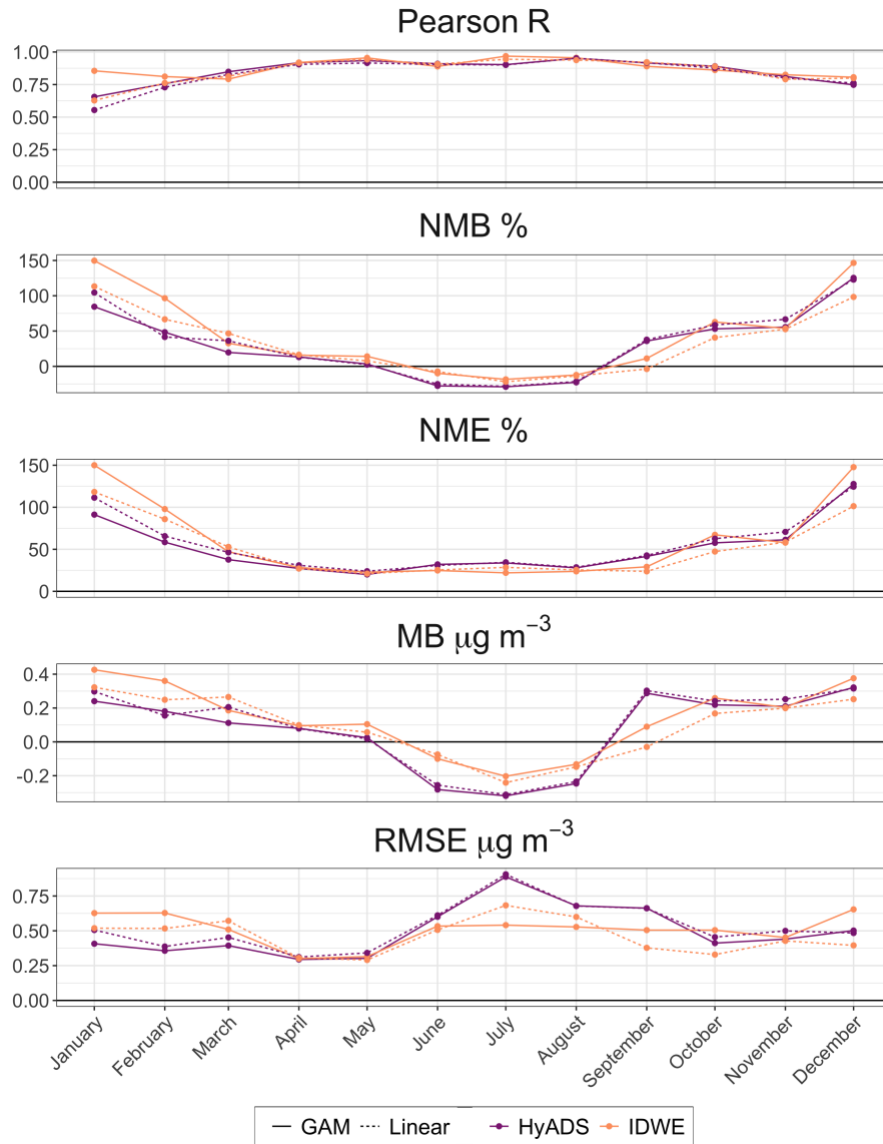

Figure SI-2: Evaluation statistics for total monthly coal  $PM_{2.5}$  source impacts  $PM_{2.5}^m$  evaluated against  $PM_{2.5}^{CMAQ-DDM}$ . Models were trained in each month in 2005 and evaluated in 2006.

## SI-1.3 Total source impact fields as $PM_{2.5}$

Raw HyADS and IDWE exposure from all coal power plants ( $\sum_{j=1}^J exposure_{i,j}^{HyADS}$  and  $\sum_{j=1}^J exposure_{i,j}^{IDWE}$ ) were highly correlated with CMAQ-DDM in 2006 (Pearson R of 0.94 for both).  $PM_{2.5}^{IDWE}$  year 2006 model predictions trained on 2005  $exposure^{IDWE}$  and  $PM_{2.5}^{CMAQ-DDM}$  yielded lower bias and error than comparable results for  $PM_{2.5}^{HyADS}$ .

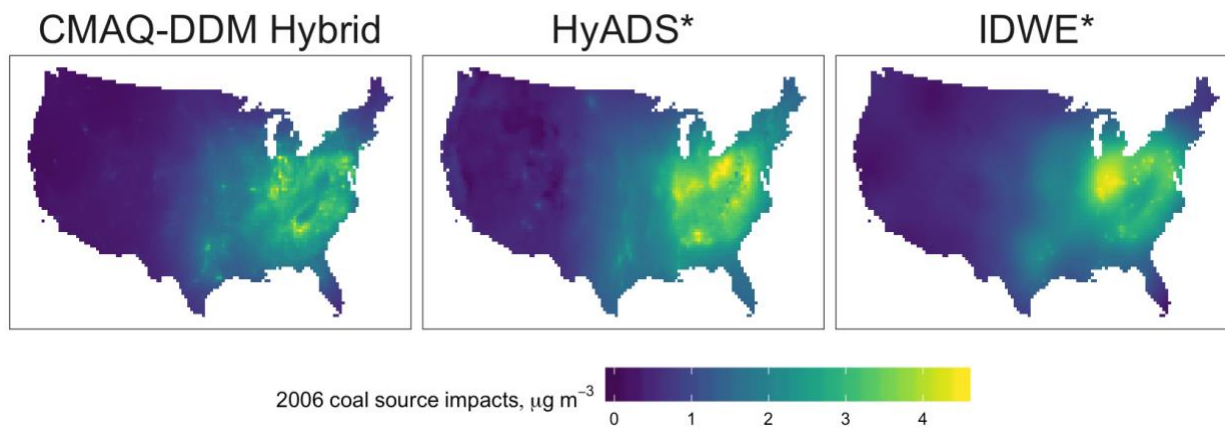

Figure SI-3: Total annual  $\text{PM}_{2.5}^{\text{CMAQ-DDM}}$ ,  $\text{PM}_{2.5}^{\text{HyADS}}$ , and  $\text{PM}_{2.5}^{\text{IDWE}}$  in 2006. \* denotes converted metrics from exposure<sup>HyADS</sup> and exposure<sup>IDWE</sup>.

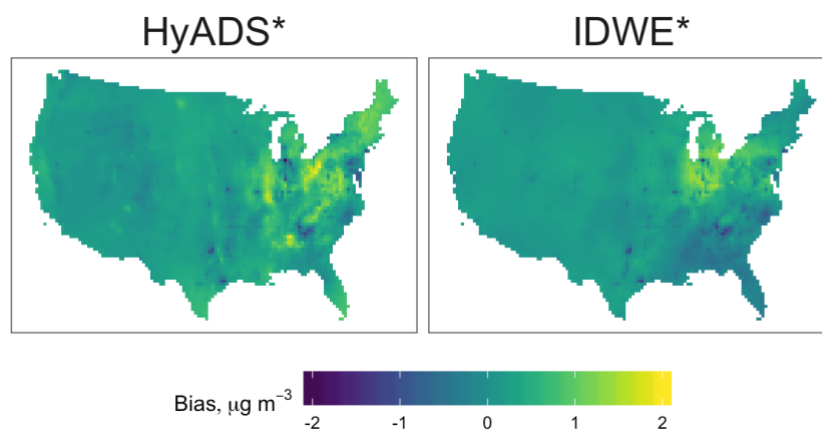

Figure SI-4: Spatial bias of total annual  $\text{PM}_{2.5}^{\text{HyADS}}$  and  $\text{PM}_{2.5}^{\text{IDWE}}$  relative to  $\text{PM}_{2.5}^{\text{CMAQ-DDM}}$  in 2006. \* denotes converted metrics from exposure<sup>HyADS</sup> and exposure<sup>IDWE</sup>.

## SI-2 Additional supplemental figures

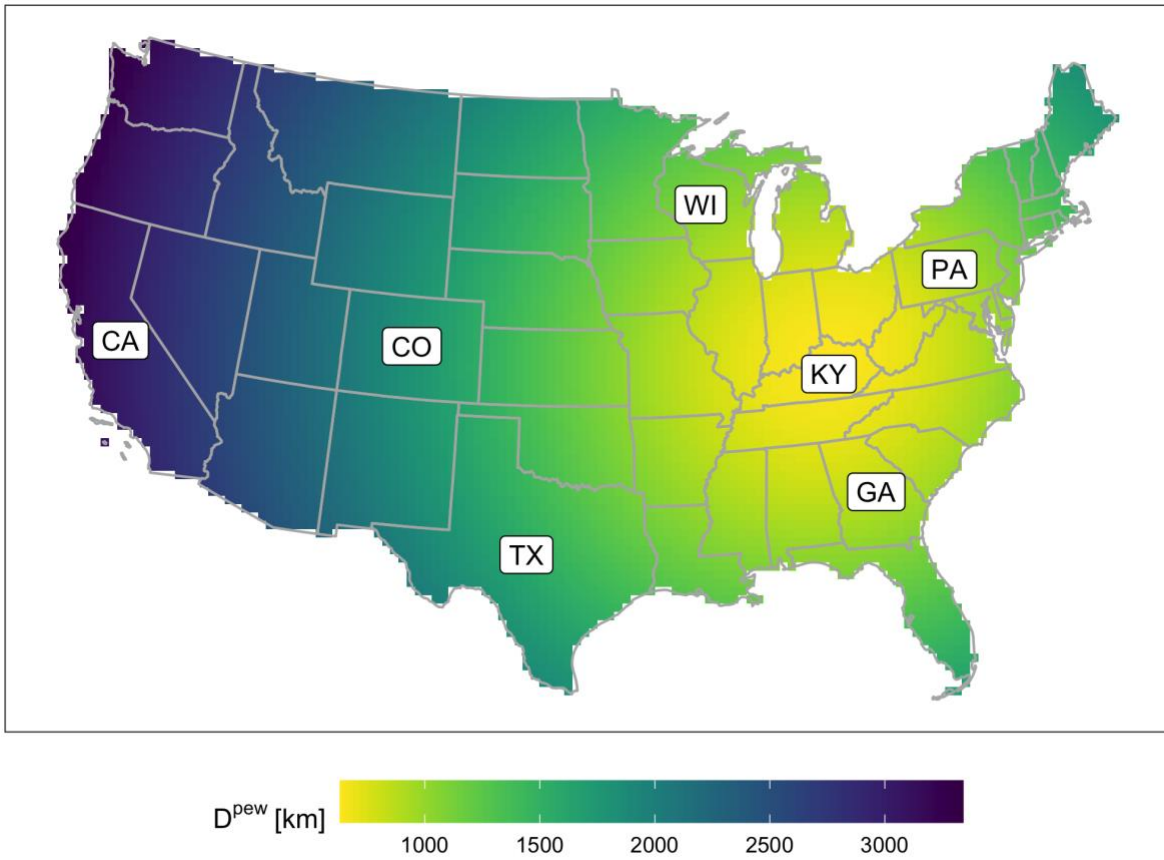

Figure SI-5: Population-emissions weighted distance ( $D^{pew}$ ) calculated for each grid cell in the contiguous United States.

## SI-2 Source impact evaluation metrics

This section presents expanded annual evaluations of  $PWSI_{i,P}^{HyADS}$  and  $PWSI_{i,P=US}^{IDWE}$  against  $PWSI_{i,P=US}^{Adjoint}$ . These figures supplement the evaluation metrics presented in Figure 3.

### SI-2.1 Annual evaluations

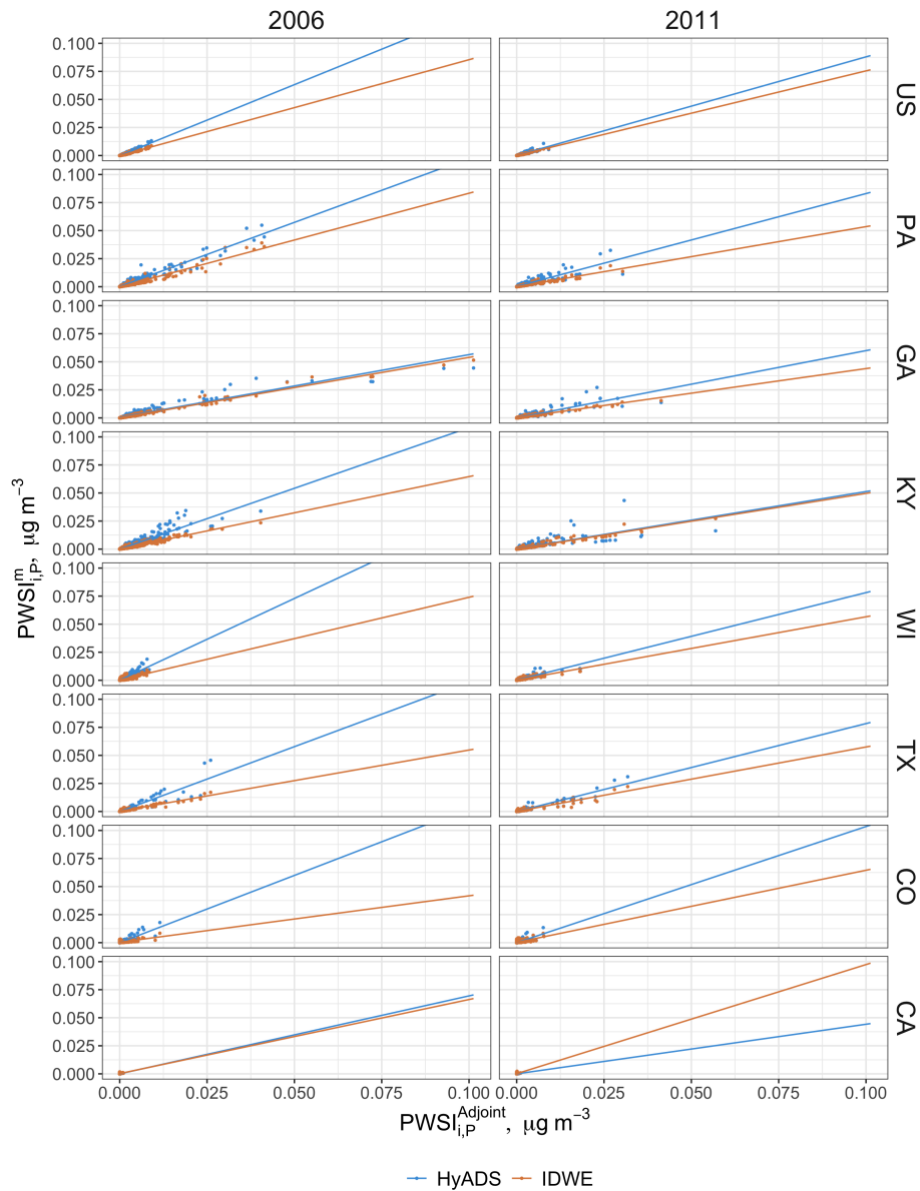

Figure SI-6: Scatterplot of  $PWSI_{i,P}^{HyADS}$  and  $PWSI_{i,P}^{IDWE}$  against  $PWSI_{i,P}^{Adjoint}$  for each coal-fired power plant.

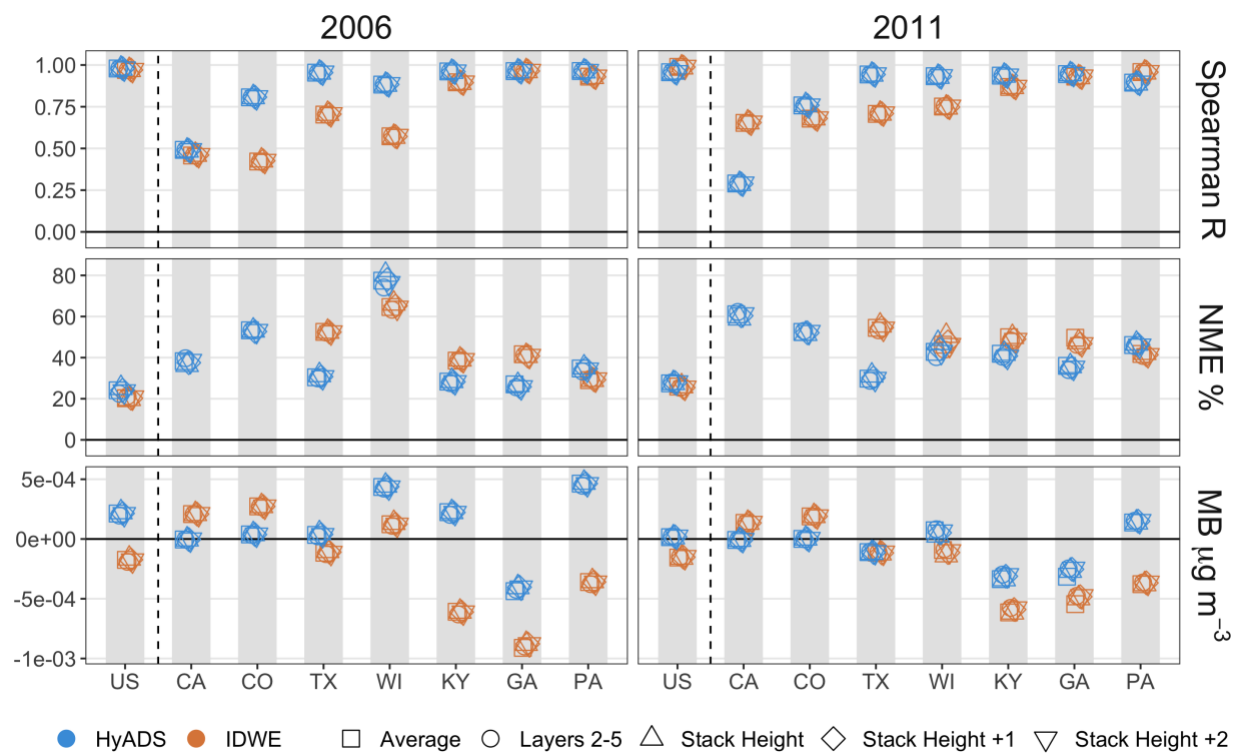

Figure SI-7: Spearman R (rank-ordered correlation), Normalized Mean Error ( $0\% < \text{NME} < +\infty$ ) and Mean Bias (MB) of  $\text{PWSI}_{i,p}^{\text{HyADS}}$  and  $\text{PWSI}_{i,p}^{\text{IDWE}}$  compared to GEOS-Chem adjoint sensitivities. IDWE\* for CA are omitted from this plot because they are many times higher than the NME in other states. The removed values range from 3,600% to 6,200%.



## SI-2.1 Monthly evaluations

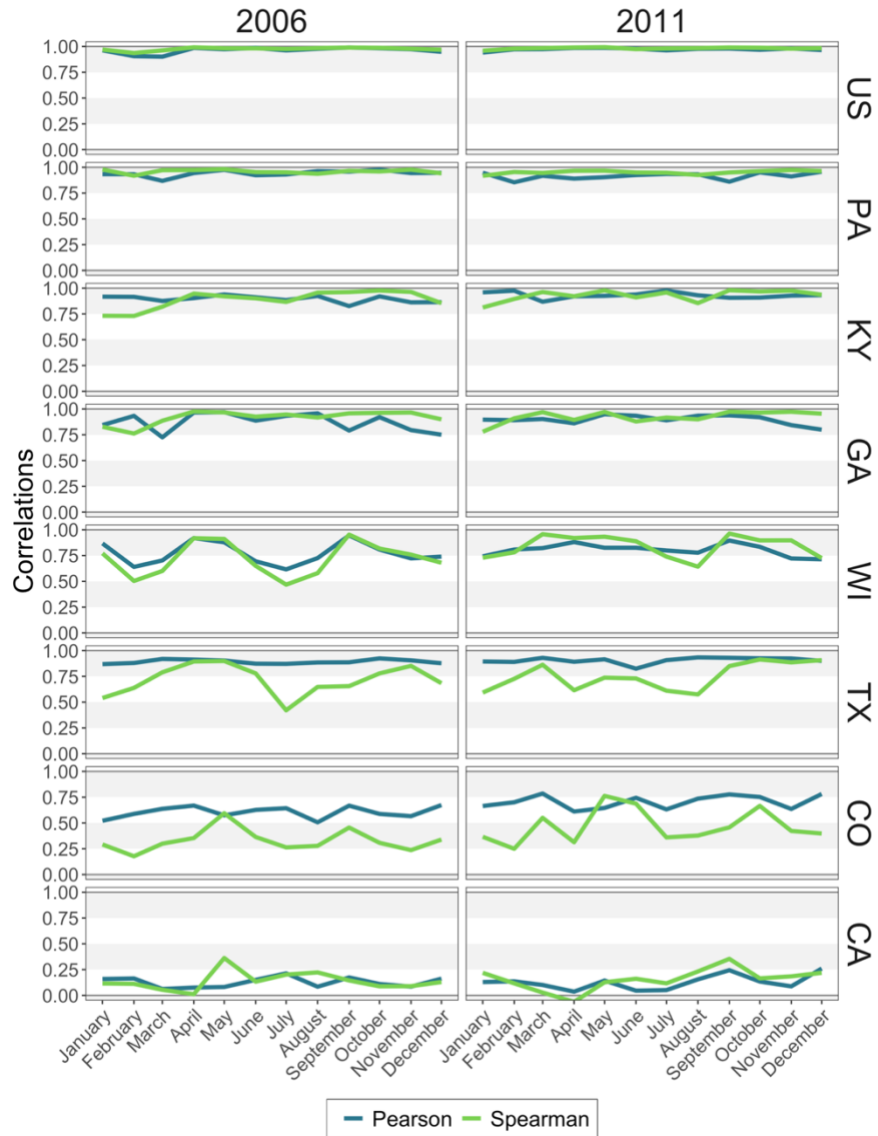

Figure SI-8: Monthly linear (Pearson R) and rank-ordered (Spearman R) correlations between  $PWSI_{P,j}^{HyADS}$  and  $PWSI_{P,j}^{IDWE}$  source impacts evaluated against  $PWSI_{P,j}^{Adjoint}$  on individual states and entire United States (US). States are ordered east to west descending.

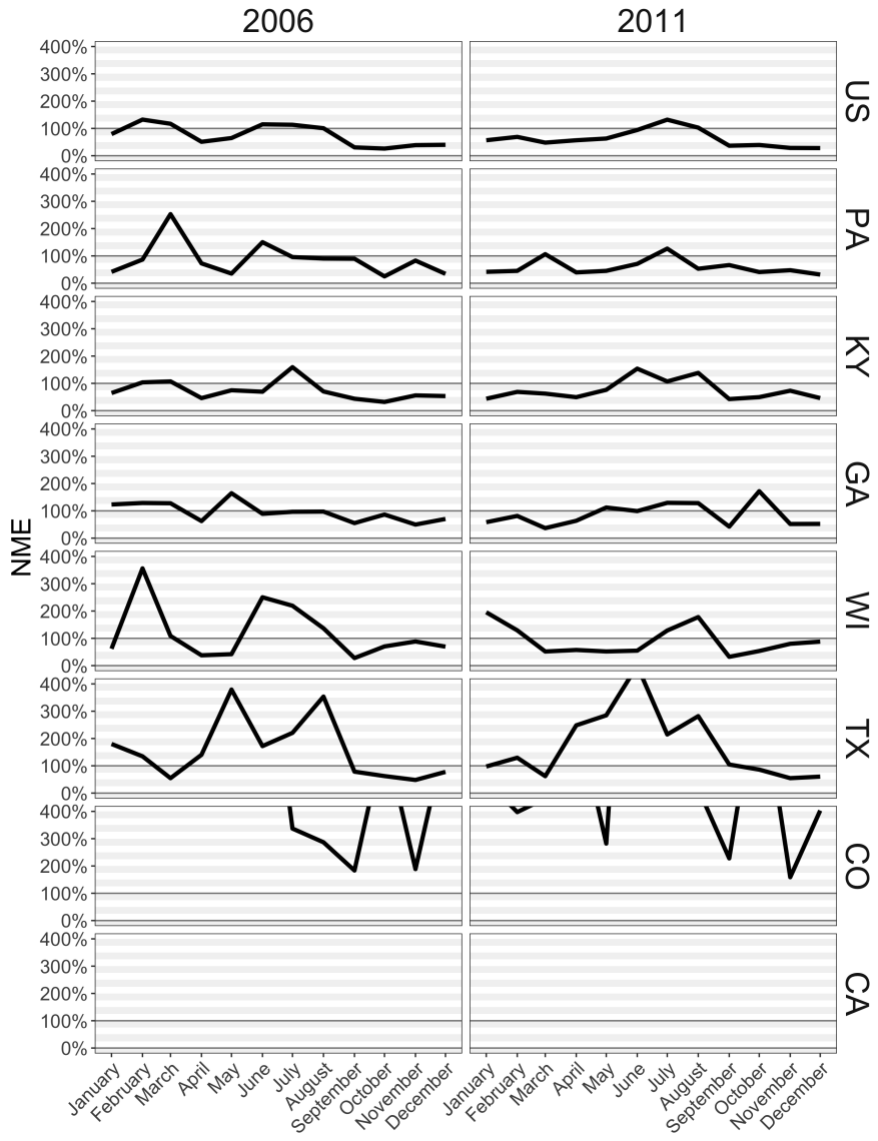

Figure SI-9: Normalized Mean Error ( $0\% < \text{NME} < +\infty$ ) of  $\text{PWSI}_{P,j}^{\text{IDWE}}$  evaluated against  $\text{PWSI}_{P,j}^{\text{HyADS}}$ . The values in Colorado (CO) range up to 18,000% and in California range from 800% to greater than 2,000,000%.

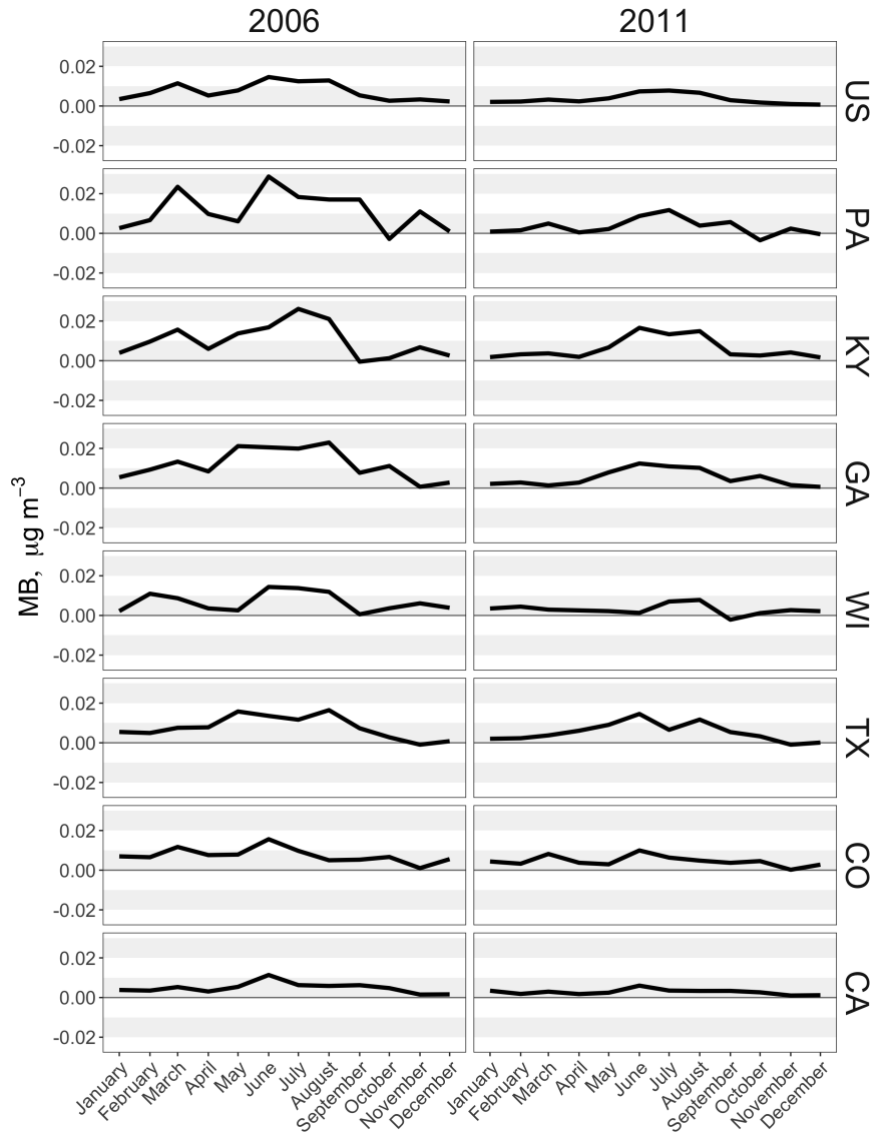

Figure SI-10: Mean bias (MB) of  $\text{PWSI}_{P,j}^{\text{IDWE}}$  evaluated against  $\text{PWSI}_{P,j}^{\text{HyADS}}$ .

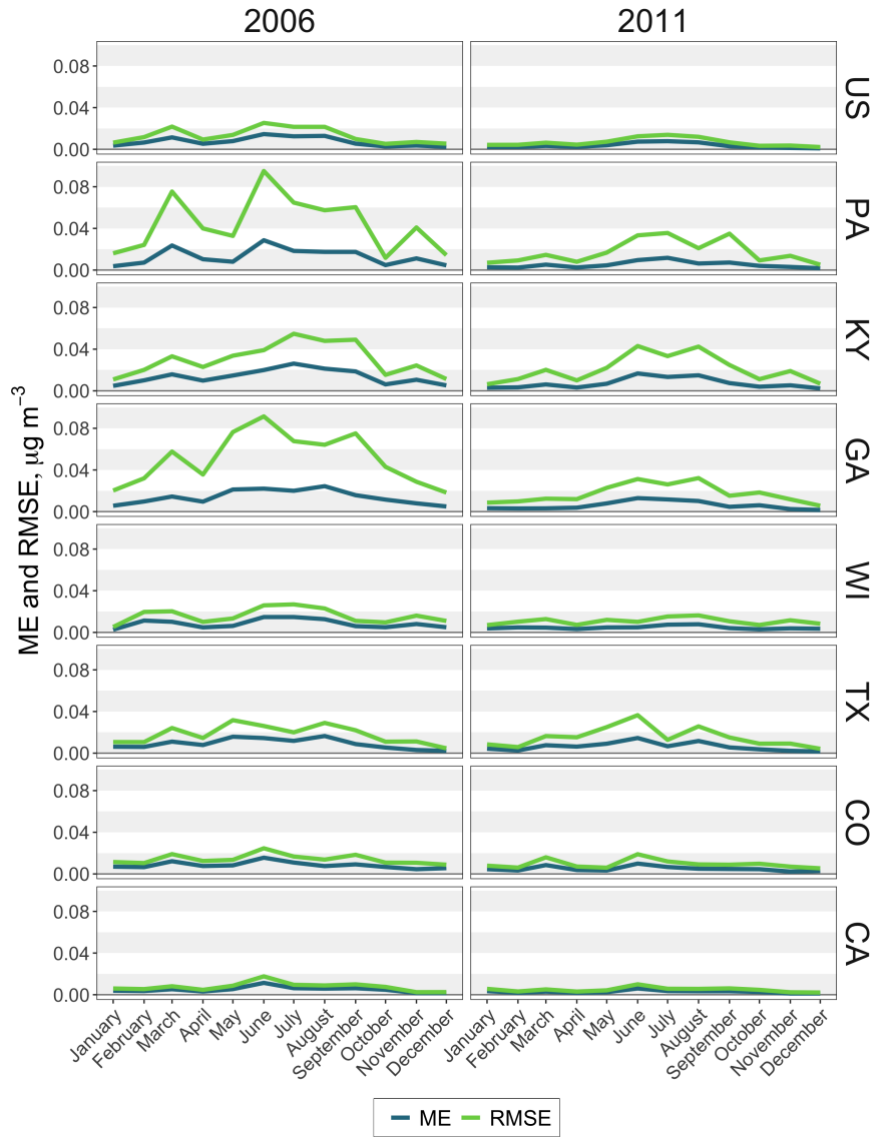

Figure SI-11: Mean error (ME) and root mean square error (RMSE) of  $\text{PWSI}_{P,j}^{\text{IDWE}}$  evaluated against  $\text{PWSI}_{P,j}^{\text{HyADS}}$ .

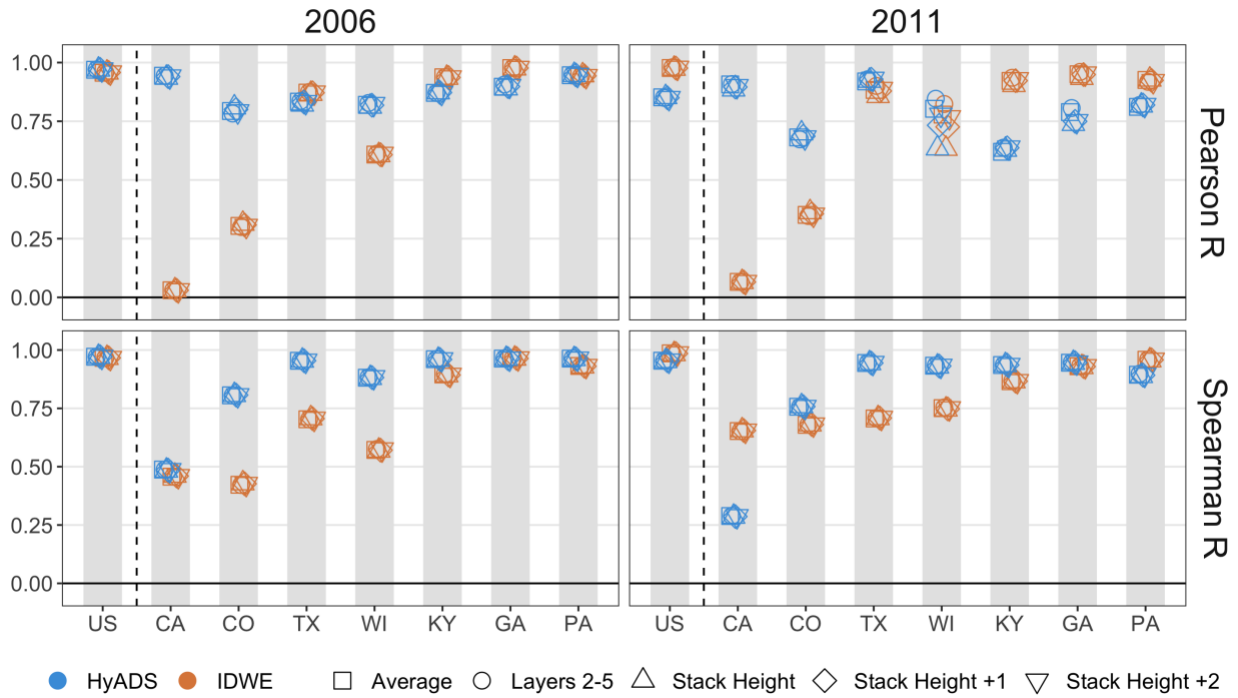

Figure SI-12: Linear (Pearson R) and rank-order (Spearman R) correlations of raw HyADS and IDWE individual source exposure metrics ( $exposure_{i,j}^{HyADS}$  and  $exposure_{i,j}^{IDWE}$ ) compared to  $PWSI_{p,j}^{Adjoint}$ .
